# Supplementary material for: A pangolin-origin SARS-CoV-2-related coronavirus: infectivity, pathogenicity, and cross-protection by preexisting immunity
Source: PubMed Central journal article supplement (PMC10276878; doi:10.1038/s41421-023-00557-9), 2023-06-17
Supplement: 41421_2023_557_MOESM3_ESM.pdf [file 41421_2023_557_MOESM3_ESM.pdf]

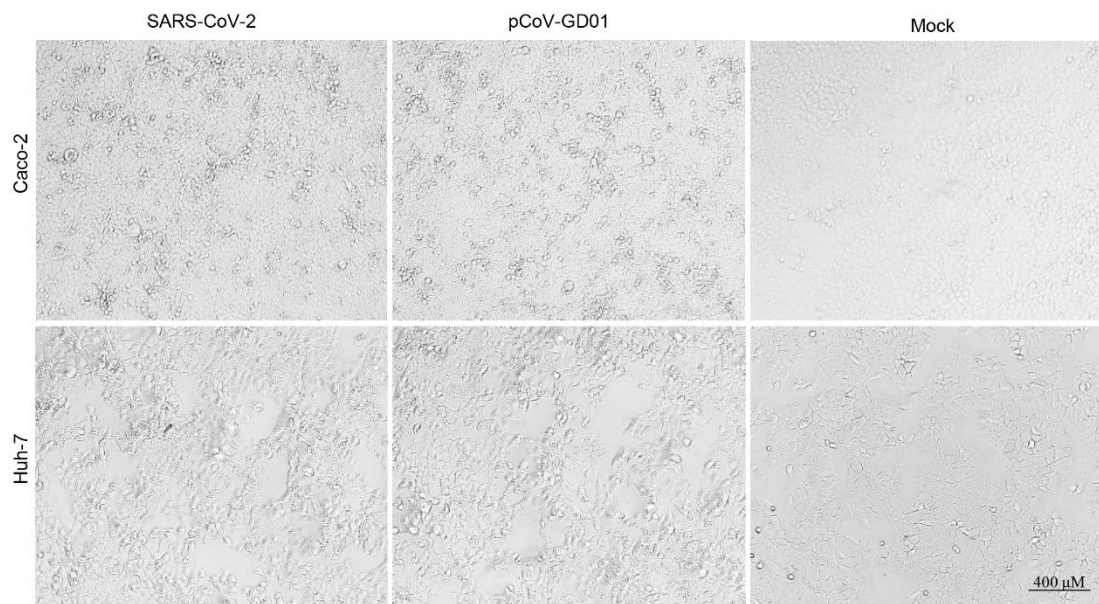

**Supplementary Fig. S3** Cytopathic effect of the virus in Caco-2 and Huh-7 cells. Microscopy image of the CPE of the virus in Caco-2 or Huh-7 cells. The CPE was seen in viral culture at 96 hpi. The experiment was performed twice independently in two laboratories and produced similar results.
