# Supplementary material for: A pangolin-origin SARS-CoV-2-related coronavirus: infectivity, pathogenicity, and cross-protection by preexisting immunity
Source: PubMed Central journal article supplement (PMC10276878; doi:10.1038/s41421-023-00557-9), 2023-06-17
Supplement: 41421_2023_557_MOESM5_ESM.pdf [file 41421_2023_557_MOESM5_ESM.pdf]

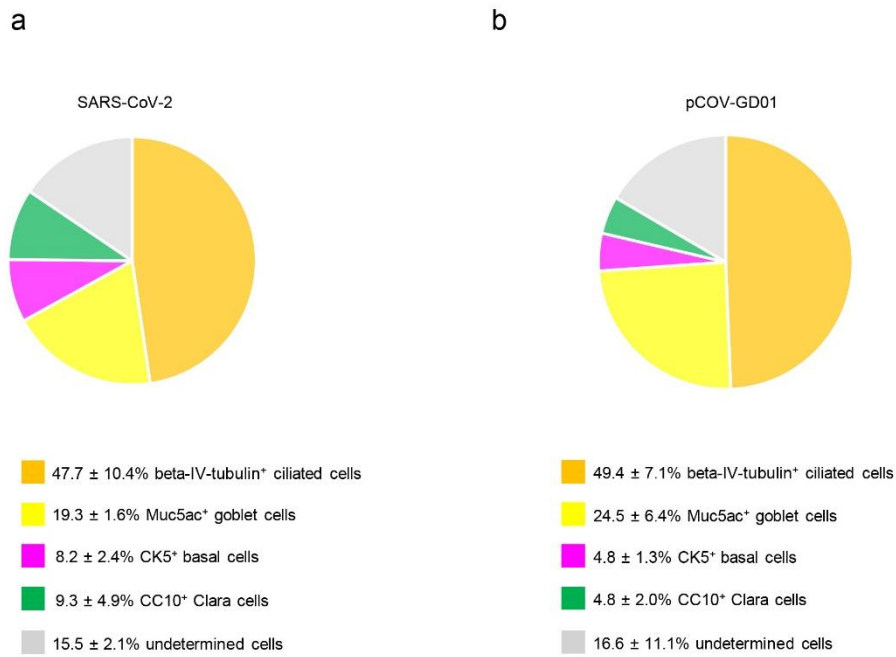

**Supplementary Fig. S5 Percentage of each cell type with the SARS-CoV-2<sup>+</sup> or pCoV-GD01<sup>+</sup> population. a&b** Statistical analysis of the percentage of each cell compartment within SARS-CoV-2<sup>+</sup> or pCoV-GD01<sup>+</sup> cells. The data are presented as means ± SD (n = 3).
