# Supplementary material for: A pangolin-origin SARS-CoV-2-related coronavirus: infectivity, pathogenicity, and cross-protection by preexisting immunity
Source: PubMed Central journal article supplement (PMC10276878; doi:10.1038/s41421-023-00557-9), 2023-06-17
Supplement: 41421_2023_557_MOESM6_ESM.pdf [file 41421_2023_557_MOESM6_ESM.pdf]

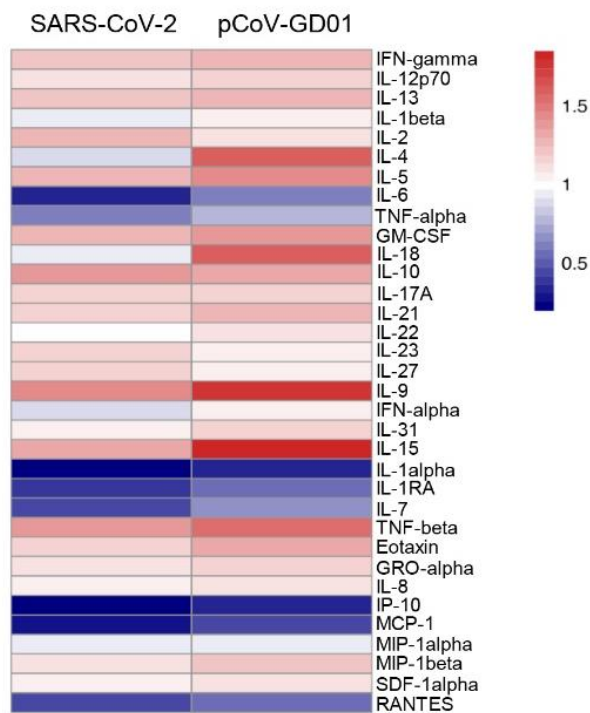

**Supplementary Fig. S6 Cytokine production in topical secretions of pCoV-GD01, SARS-CoV-2 inoculated human airway epithelium organoids.** Cytokine production in the topical secretions of human airway epithelium organoids at 24 hpi, the color represents fold change of detected cytokine concentration vs. that of MOCK samples.
