# Supplementary material for: A pangolin-origin SARS-CoV-2-related coronavirus: infectivity, pathogenicity, and cross-protection by preexisting immunity
Source: PubMed Central journal article supplement (PMC10276878; doi:10.1038/s41421-023-00557-9), 2023-06-17
Supplement: 41421_2023_557_MOESM8_ESM.pdf [file 41421_2023_557_MOESM8_ESM.pdf]

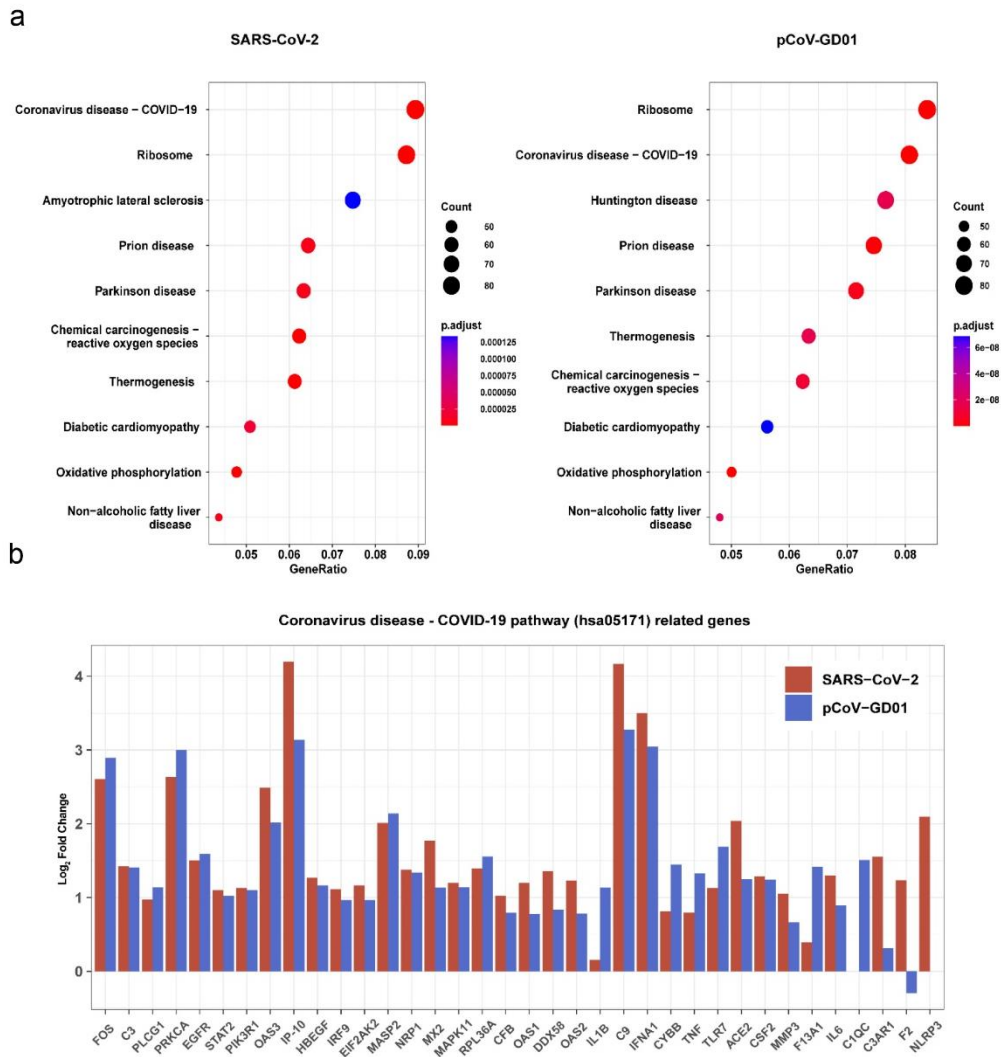

**Supplementary Fig. S8 KEGG enrichment of differential expression genes in SARS-CoV-2- and pCoV-GD01-inoculated human airway epithelium organoids. a** Dot plot of KEGG enrichment of differential expression genes in SARS-CoV-2- and pCoV-GD01- inoculated human airway epithelium organoids. The size of dots represents enriched genes count, while the color represents p-adjust value of each enriched category. **b** Fold change of the differential expression genes in KEGG pathway coronavirus disease—COVID-19.
