# Supplementary material for: A pangolin-origin SARS-CoV-2-related coronavirus: infectivity, pathogenicity, and cross-protection by preexisting immunity
Source: PubMed Central journal article supplement (PMC10276878; doi:10.1038/s41421-023-00557-9), 2023-06-17
Supplement: 41421_2023_557_MOESM9_ESM.pdf [file 41421_2023_557_MOESM9_ESM.pdf]

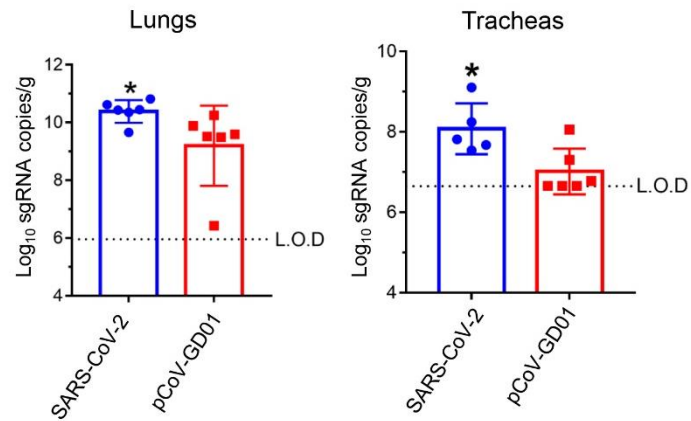

**Supplementary Fig. S9 Viral sgRNA in the lungs and tracheas of SARS-CoV-2- or pCoV-GD01-inoculated hACE2 Mice.** 8-week-old hACE2 mice (n = 6) at were inoculated with  $6 \times 10^3$  PFU of pCoV-GD01 or SARS-CoV-2 through i.n. administration, and all mice were sacrificed at 72 hpi for lungs. Viral sgRNAs in the lungs and tracheas were determined by qRT-PCR. Data are shown as means  $\pm$  SD. Student's t-test was performed for statistical analysis (\* $p < 0.05$ ). L.O.D, limit of detection.
