# Supplementary material for: A pangolin-origin SARS-CoV-2-related coronavirus: infectivity, pathogenicity, and cross-protection by preexisting immunity
Source: PubMed Central journal article supplement (PMC10276878; doi:10.1038/s41421-023-00557-9), 2023-06-17
Supplement: 41421_2023_557_MOESM10_ESM.pdf [file 41421_2023_557_MOESM10_ESM.pdf]

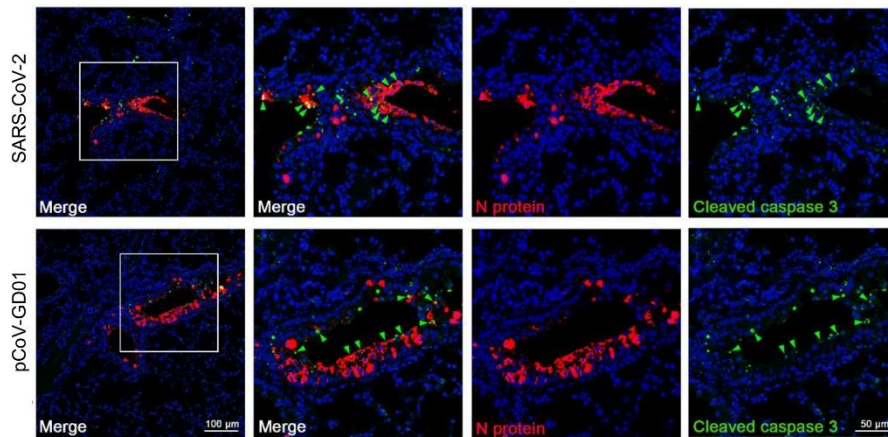

**Supplementary Fig. S10 Pathological changes and inflammatory responses in pCoV-GD01-inoculated hACE2 Mice.** Multiplex IF staining analysis for hACE2 mice paraffin lung sections with markers for cleaved-caspase3 (green) and N protein (red). White frame was magnified on the right. Green arrows indicated the N protein<sup>+</sup>/C-Casp3<sup>+</sup> cells.
