# Supplementary material for: A pangolin-origin SARS-CoV-2-related coronavirus: infectivity, pathogenicity, and cross-protection by preexisting immunity
Source: PubMed Central journal article supplement (PMC10276878; doi:10.1038/s41421-023-00557-9), 2023-06-17
Supplement: 41421_2023_557_MOESM12_ESM.pdf [file 41421_2023_557_MOESM12_ESM.pdf]

**Supplementary Table S1 Primers used for qRT-PCR.**

|             |                |                            |
|-------------|----------------|----------------------------|
| E_CoV_gRNA  | Forward primer | ACAGGTACGTTAATAGTTAATAGCGT |
|             | Reverse primer | ATATTGCAGCAGTACGCACACA     |
|             | Probe          | ACACTAGCCATCCTTACTGCGCTTCG |
| E_CoV_sgRNA | Forward primer | CGATCTCTTGTAGATCTGTTCTC    |
|             | Reverse primer | ATATTGCAGCAGTACGCACACA     |
|             | Probe          | ACACTAGCCATCCTTACTGCGCTTCG |
