# Supplementary material for: A pangolin-origin SARS-CoV-2-related coronavirus: infectivity, pathogenicity, and cross-protection by preexisting immunity
Source: PubMed Central journal article supplement (PMC10276878; doi:10.1038/s41421-023-00557-9), 2023-06-17
Supplement: 41421_2023_557_MOESM13_ESM.pdf [file 41421_2023_557_MOESM13_ESM.pdf]

**Supplementary Table S2 Sequence information of CoVs Supplementary Fig. S1.**

| CoV strains            | Accession ID in GISAID |
|------------------------|------------------------|
| pCoV-GD01              | EPI_ISL_410721         |
| pCoV-GD/MP789          | EPI_ISL_412860         |
| pCoV-GX/P1E            | EPI_ISL_410539         |
| pCoV-GX/P2V            | EPI_ISL_410542         |
| pCoV-GX/P4L            | EPI_ISL_410542         |
| pCoV-GX/P5E            | EPI_ISL_410541         |
| pCoV-GX/P5L            | EPI_ISL_410540         |
| bCoV-Laos/BANAL-20-52  | EPI_ISL_4302644        |
| bCoV-Laos/BANAL-20-236 | EPI_ISL_4302647        |
