# Supplementary material for: A pangolin-origin SARS-CoV-2-related coronavirus: infectivity, pathogenicity, and cross-protection by preexisting immunity
Source: PubMed Central journal article supplement (PMC10276878; doi:10.1038/s41421-023-00557-9), 2023-06-17
Supplement: 41421_2023_557_MOESM14_ESM.pdf [file 41421_2023_557_MOESM14_ESM.pdf]

**Supplementary Table S3 Details of Convalescent sera.**

| Patient NO. | Sex    | Age | Diagnosis |
|-------------|--------|-----|-----------|
| 29          | male   | 75  | severe    |
| 34          | male   | 64  | mild      |
| 7           | male   | 32  | mild      |
| 2           | Female | 29  | mild      |
| 4           | male   | 35  | mild      |
| 5           | male   | 68  | mild      |
| 9           | male   | 37  | mild      |
| 14          | male   | 37  | mild      |
| 15          | male   | 37  | mild      |
| 17          | Female | 53  | mild      |
| 18          | male   | 44  | mild      |
| 20          | male   | 53  | mild      |
| 21          | male   | 66  | mild      |
| 23          | male   | 32  | mild      |
| 25          | male   | 40  | severe    |
| 27          | Female | 53  | mild      |
| 30          | Female | 53  | mild      |
| 31          | male   | 64  | mild      |
| 33          | male   | 36  | severe    |
